# Supplementary material
Source: PubMed Central journal article supplement (PMC3264736)

## Supporting Information

Structural and Biophysical Insights into the Ligand-Free Pitx2 Homeodomain and  
a Ring Dermoid of the Cornea Inducing Homeodomain Mutant

*Thomas Doerdelmann<sup>†</sup>, Douglas J. Kojetin<sup>†,‡</sup>, Jamie M. Baird-Titus<sup>§</sup>, Laura A. Solt<sup>‡</sup>, Thomas P.  
Burris<sup>‡</sup> and Mark Rance<sup>†\*</sup>*

### Supplementary Figure 1

$^{15}\text{N}$ -relaxation rates for the Pitx2 wild-type homeodomain (red) and R24H mutant (black). The concentration series for the mutant protein establishes the concentration dependence of the  $R_1$  and  $R_2$  measurements, but clearly demonstrates the increased flexibility of the N-terminal arm and the L1 and L2 loop regions independent of protein concentration. Cylinders indicate the positions of the  $\alpha$ -helices.

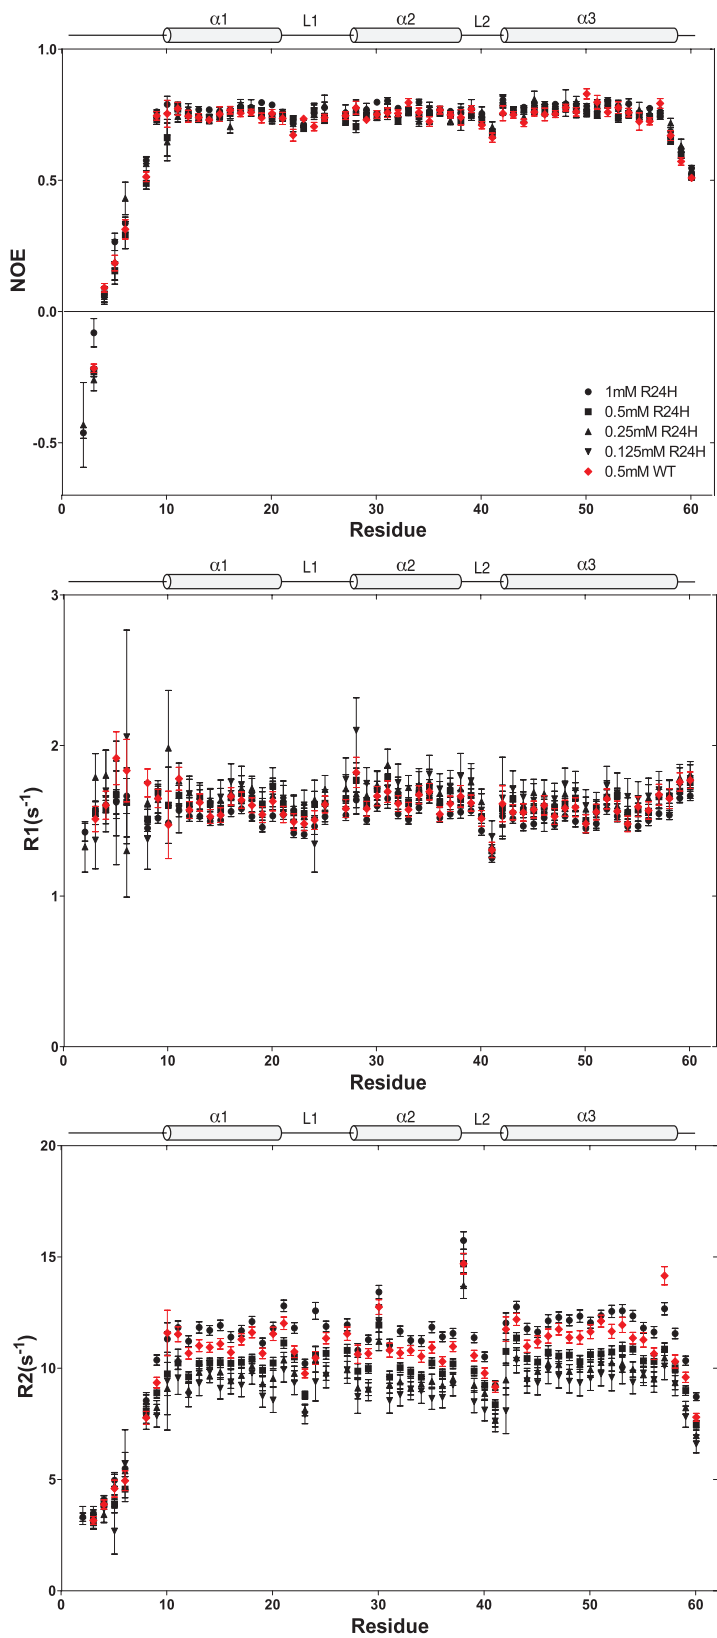

### Supplementary Figure 2

Amide backbone chemical shift resonances in a standard  $^1\text{H}$ - $^{15}\text{N}$  HSQC experiment. **A.** N-terminal resonances 1-7 (left to right) with the second box to the left including overlapped residues 2 and 3. **B.** C-terminal tail of the expression system resonances 61-66 (left to right)

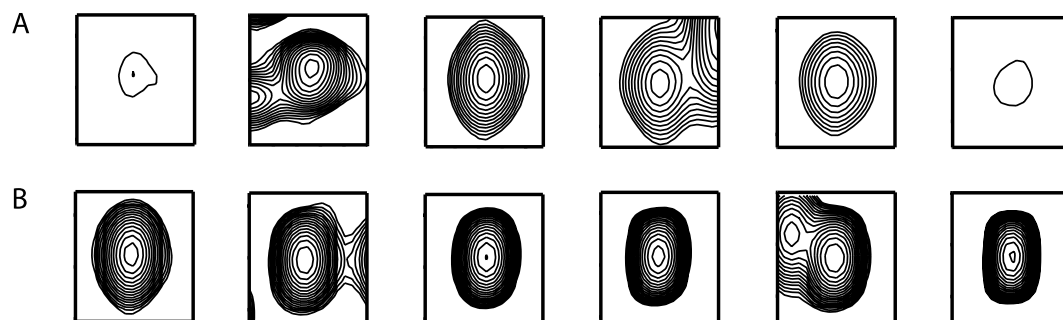

### Supplementary Figure 3

2D  $^1\text{H}$ - $^{15}\text{N}$  HSQC spectra of the wild-type (top), R24H mutant (middle) and V45L (bottom) Pitx2 homeodomains. Data was recorded at 600 MHz and a temperature of 295K.

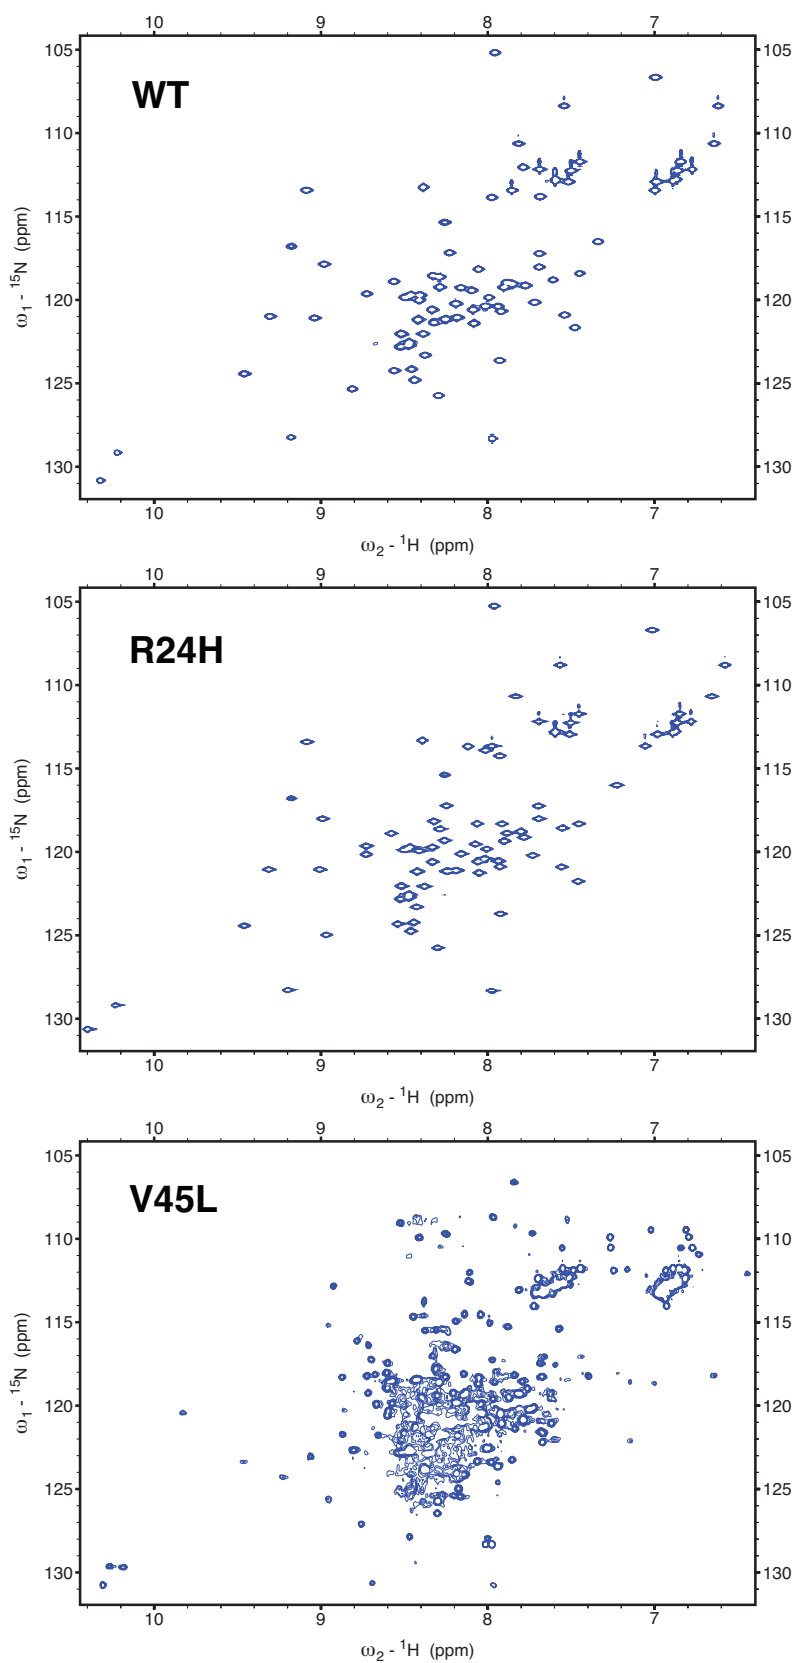

Supplement: NIHMS348272-supplement-1_si_001.pdf [file NIHMS348272-supplement-1_si_001.pdf]
